# Supplementary material for: CoronaVac and ChAdOx1 Vaccination and Gamma Infection Elicited Neutralizing Antibodies against the SARS-CoV-2 Delta Variant
Source: MDPI journal article supplement (doi:10.3390/v14020305), 2022-02-01
Supplement: s1 [file s1]

## **Supplementary Material**

### **Table of Contents**

|                                                                                                                                 |   |
|---------------------------------------------------------------------------------------------------------------------------------|---|
| <b>Supplementary Table S1.</b> CoronaVac and ChAdOx1 vaccinated sera used in this study.....                                    | 2 |
| <b>Supplementary Table S2.</b> Convalescent sera used in this study.....                                                        | 3 |
| <b>Supplementary Table S3.</b> SARS-CoV-2 variants detection frequency from January to December 2021 in Brazil.....             | 4 |
| <b>Supplementary Table S4.</b> Daily new cases, death rate, and percentage of full-vaccinated population in Brazil in 2021..... | 5 |

**Supplementary Table S1.** CoronaVac and ChAdOx1 vaccinated sera used in this study.

|           | Sample ID      | Sex    | Age | Date of 2nd vaccination<br>(MM/DD/YY) | Serum collection<br>(MM/DD/YY) | Neutralizing antibody capacity (AUC) |       |       |
|-----------|----------------|--------|-----|---------------------------------------|--------------------------------|--------------------------------------|-------|-------|
|           |                |        |     |                                       |                                | B lineage                            | Gamma | Delta |
| CoronaVac | 113            | Female | 60  | 02/10/21                              | 03/14/21                       | 214.2                                | 11.5  | 333.9 |
|           | 115            | Female | 38  | 02/09/21                              | 03/15/21                       | 437.9                                | 330.0 | 399.1 |
|           | 117            | Female | 43  | 02/09/21                              | 03/16/21                       | 390.8                                | 56.6  | 464.7 |
|           | 141            | Female | 57  | 02/23/21                              | 03/17/21                       | 185.8                                | 106.6 | 308.5 |
|           | 143            | Female | 38  | 02/12/21                              | 03/17/21                       | 292.5                                | 264.8 | 294.7 |
|           | 150            | Female | 35  | 02/22/21                              | 03/17/21                       | 179.2                                | 5.1   | 39.7  |
|           | 153            | Female | 35  | 02/22/21                              | 03/17/21                       | 198.7                                | 127.1 | 288.7 |
|           | 154            | Female | 45  | 02/18/21                              | 03/17/21                       | 223.3                                | 156.3 | 195.4 |
|           | 160            | Female | 42  | 02/17/21                              | 03/17/21                       | 5.4                                  | 2.1   | 362.3 |
|           | 171            | Female | 35  | 02/10/21                              | 03/17/21                       | 71.6                                 | 3.0   | 82.8  |
|           | 173            | Male   | 53  | 02/22/21                              | 03/17/21                       | 22.9                                 | 8.8   | 5.3   |
|           | 182            | Female | 63  | 02/22/21                              | 03/17/21                       | 4.2                                  | 0.0   | 3.5   |
|           | 184            | Female | 40  | 02/19/21                              | 03/17/21                       | 32.4                                 | 8.3   | 4.4   |
|           | 191            | Female | 41  | 02/22/21                              | 03/17/21                       | 61.8                                 | 4.0   | 86.5  |
|           | Geometric mean |        |     |                                       |                                | 165.8                                | 77.4  | 205.0 |
| ChAdOx1   | 123            | Female | 64  | 02/09/21                              | 03/05/21                       | 277.2                                | 250.0 | 409.6 |
|           | 125            | Female | 28  | 02/15/21                              | 03/05/21                       | 269.0                                | 250.0 | 337.6 |
|           | 126            | Male   | 55  | 02/12/21                              | 03/05/21                       | 301.4                                | 12.6  | 471.2 |
|           | 127            | Female | 47  | 02/12/21                              | 03/05/21                       | 177.4                                | 8.6   | 200.6 |
|           | 131            | Female | 60  | 02/09/21                              | 03/08/21                       | 383.2                                | 373.1 | 387.4 |
|           | 135            | Female | 34  | 02/11/21                              | 03/08/21                       | 255.3                                | 217.7 | 267.4 |
|           | 138            | Female | 44  | 02/09/21                              | 03/11/21                       | 73.1                                 | 48.1  | 290.2 |
|           | 147            | Female | 55  | 02/02/21                              | 03/17/21                       | 91.4                                 | 114.0 | 182.3 |
|           | 149            | Female | 37  | 02/01/21                              | 03/17/21                       | 458.2                                | 446.0 | 466.6 |
|           | 157            | Female | 37  | 02/02/21                              | 03/17/21                       | 499.5                                | 498.9 | 499.8 |
|           | 163            | Female | 50  | 02/01/21                              | 03/17/21                       | 145.2                                | 81.4  | 201.8 |
|           | 167            | Female | 39  | 02/01/21                              | 03/17/21                       | 82.7                                 | 12.6  | 10.8  |
|           | 168            | Female | 37  | 01/29/21                              | 03/17/21                       | 43.4                                 | 0.3   | 54.5  |
|           | 189            | Male   | 52  | 02/01/21                              | 03/17/21                       | 129.0                                | 24.5  | 72.6  |
|           | Geometric mean |        |     |                                       |                                | 227.6                                | 167.0 | 275.2 |

**Supplementary Table S2.** Convalescent sera used in this study.

|                   | Sample ID | Sex    | Age | Disease severity | Date of test (MM/DD/YY) | RT-PCR ( $\Delta$ CT) | Serum collection (MM/DD/YY) | Neutralizing antibody capacity (AUC) |       |       |
|-------------------|-----------|--------|-----|------------------|-------------------------|-----------------------|-----------------------------|--------------------------------------|-------|-------|
|                   |           |        |     |                  |                         |                       |                             | B lineage                            | Gamma | Delta |
| Non-VOCs infected | 1HC       | Male   | 64  | Severe           | 03/19/20                | 23,20                 | 03/06/21                    | 278.3                                | 247.3 | 305.6 |
|                   | 2HC       | Male   | 32  | Severe           | 04/17/20                | 24,22                 | 03/06/21                    | 375.7                                | 398.2 | 393.4 |
|                   | 3HC       | Female | 68  | Severe           | 05/15/20                | 24,53                 | 03/06/21                    | 68.3                                 | 192.5 | 397.6 |
|                   | 4HC       | Female | 39  | Severe           | 05/15/20                | 25,10                 | 03/06/21                    | 154.8                                | 87.7  | 143.0 |
|                   | 5HC       | Male   | 33  | Severe           | 04/01/20                | 20,22                 | 03/06/21                    | 59.5                                 | 174.3 | 193.0 |
|                   | 6HC       | Male   | 42  | Severe           | 05/09/20                | 19,98                 | 03/06/21                    | 450.2                                | 347.9 | 406.0 |
|                   | 7HC       | Male   | 33  | Severe           | 05/06/20                | 21,80                 | 03/06/21                    | 365.7                                | 456.6 | 454.4 |
|                   | 8HC       | Male   | 67  | Severe           | 05/06/20                | 22,00                 | 03/06/21                    | 439.5                                | 465.7 | 473.4 |
|                   | 9HC       | Male   | 53  | Severe           | 04/25/20                | 24,11                 | 03/06/21                    | 494.0                                | 486.2 | 498.6 |
|                   | 10HC      | Male   | 75  | Severe           | 05/15/20                | 22,34                 | 03/06/21                    | 149.8                                | 70.0  | 99.4  |
|                   | 11HC      | Male   | 60  | Severe           | 04/23/20                | 22,54                 | 03/06/21                    | 436.9                                | 420.0 | 427.9 |
|                   | 12HC      | Male   | 62  | Severe           | 05/12/20                | 21,89                 | 03/06/21                    | 111.9                                | 164.3 | 137.7 |
|                   | 13HC      | Female | 47  | Severe           | 05/08/20                | 20,89                 | 03/06/21                    | 136.9                                | 41.4  | 136.5 |
|                   | 14HC      | Female | 38  | Severe           | 04/23/20                | 20,20                 | 03/06/21                    | 178.3                                | 60.2  | 98.7  |
|                   | 15HC      | Male   | 34  | Severe           | 04/26/20                | 20,55                 | 03/06/21                    | 58.6                                 | 1.5   | 30.8  |
| Geometric mean    |           |        |     |                  |                         |                       |                             | 250.6                                | 240.9 | 279.7 |
| Gamma infected    | 1         | Male   | 43  | Mild             | 04/02/2021              | 22,6                  | 12/05/2021                  | 229.1                                | 446.6 | 191.8 |
|                   | 2         | Male   | 36  | Mild             | 09/02/2021              | 20,27                 | 20/05/2021                  | 245.5                                | 464.5 | 213.7 |
|                   | 3         | Male   | 39  | Mild             | 09/02/2021              | 16,47                 | 20/05/2021                  | 370.0                                | 498.4 | 325.5 |
|                   | 4         | Female | 27  | Mild             | 14/02/2021              | 22,21                 | 14/05/2021                  | 49.8                                 | 92.4  | 51.6  |
|                   | 5         | Female | 25  | Mild             | 26/02/2021              | 27,52                 | 20/05/2021                  | 11.2                                 | 202.6 | 2.1   |
|                   | 6         | Male   | 23  | Mild             | 05/03/2021              | 24,66                 | 20/05/2021                  | 84.8                                 | 310.3 | 82.7  |
|                   | 7         | Female | 19  | Mild             | 29/03/2021              | 21,91                 | 18/05/2021                  | 35.2                                 | 330.0 | 11.9  |
|                   | 8         | Female | 45  | Mild             | 18/03/2021              | 23,08                 | 18/05/2021                  | 83.6                                 | 313.9 | 16.8  |
|                   | 9         | Male   | 24  | Mild             | 24/03/2021              | 23,56                 | 18/05/2021                  | 71.0                                 | 299.0 | 47.6  |
|                   | 10        | Female | 53  | Mild             | 19/03/2021              | 21,04                 | 20/05/2021                  | 374.5                                | 493.7 | 316.5 |
|                   | 11        | Female | 23  | Mild             | 03/02/2021              | 25,65                 | 12/05/2021                  | 479.3                                | 499.7 | 454.0 |
|                   | 12        | Female | 44  | Mild             | 05/02/2021              | 23,55                 | 12/05/2021                  | 285.5                                | 443.7 | 244.7 |
|                   | 13        | Female | 45  | Mild             | 11/02/2021              | 26,11                 | 20/05/2021                  | 12.5                                 | 270.5 | 0.0   |
|                   | 14        | Female | 39  | Mild             | 15/02/2021              | 22,85                 | 20/05/2021                  | 12.5                                 | 30.5  | 1.0   |
|                   | 15        | Female | 40  | Mild             | 09/02/2021              | 22,1                  | 20/05/2021                  | 21.1                                 | 81.0  | 0.6   |
|                   | 16        | Female | 48  | Mild             | 15/02/2021              | 24,93                 | 20/05/2021                  | 26.4                                 | 246.5 | 1.9   |
|                   | 17        | Male   | 29  | Mild             | 11/02/2021              | 24,25                 | 20/05/2021                  | 31.9                                 | 200.5 | 29.4  |
|                   | 18        | Female | 48  | Mild             | 17/02/2021              | 22,87                 | 20/05/2021                  | 3.8                                  | 102.5 | 1.9   |
| Geometric mean    |           |        |     |                  |                         |                       |                             | 134.9                                | 295.9 | 110.8 |

**Supplementary Table S3.** SARS-CoV-2 variants detection frequency from January to December 2021 in Brazil.

| Date<br>(MM/DD/YY) | SARS-CoV-2 variants detection frequency (%) |       |       |         |        |
|--------------------|---------------------------------------------|-------|-------|---------|--------|
|                    | Alpha                                       | Gamma | Delta | Omicron | Others |
| 01/01/21           | 1.28                                        | 22.59 | 0     | 0       | 76.25  |
| 01/11/21           | 3.89                                        | 19.26 | 0     | 0       | 77     |
| 01/25/21           | 3.77                                        | 25.47 | 0     | 0       | 70.9   |
| 02/08/21           | 1.48                                        | 33.86 | 0     | 0       | 64.8   |
| 02/22/21           | 3.13                                        | 55.15 | 0     | 0       | 41.82  |
| 03/08/21           | 2.6                                         | 75.53 | 0     | 0       | 22     |
| 03/22/21           | 3.94                                        | 85.52 | 0     | 0       | 10.64  |
| 04/05/21           | 4.29                                        | 88.83 | 0     | 0       | 6.98   |
| 04/19/21           | 3.54                                        | 91.34 | 0     | 0       | 5.12   |
| 05/03/21           | 2.31                                        | 94.88 | 0.25  | 0       | 2.66   |
| 05/17/21           | 2.13                                        | 95.77 | 0.3   | 0       | 1.91   |
| 05/31/21           | 2.41                                        | 95.14 | 0.12  | 0       | 2.33   |
| 06/14/21           | 0.98                                        | 96.32 | 0.32  | 0       | 2.5    |
| 06/28/21           | 1.46                                        | 94.79 | 2.06  | 0       | 1.74   |
| 07/12/21           | 0.28                                        | 89.09 | 9.58  | 0       | 1.08   |
| 07/26/21           | 0.36                                        | 78.37 | 20.36 | 0       | 1.01   |
| 08/09/21           | 0.08                                        | 56.12 | 42.81 | 0       | 1.09   |
| 08/28/21           | 0.09                                        | 32.69 | 66.59 | 0       | 0.73   |
| 09/06/21           | 0.08                                        | 12.43 | 87.29 | 0       | 0.2    |
| 09/20/21           | 0                                           | 7.2   | 92.29 | 0       | 0.51   |
| 10/04/21           | 0                                           | 7.89  | 91.77 | 0       | 0.44   |
| 10/18/21           | 0                                           | 2.47  | 97.53 | 0       | 0      |
| 11/01/21           | 0                                           | 0.98  | 99.02 | 0       | 0      |
| 11/15/21           | 0                                           | 0.46  | 99.54 | 0       | 0      |
| 11/29/21           | 0                                           | 0.6   | 99.26 | 0.14    | 0      |
| 12/13/21           | 0                                           | 0.18  | 96.86 | 2.96    | 0      |
| 12/27/21           | 0                                           | 1.32  | 61.49 | 37.19   | 0      |

**Supplementary Table S4.** Daily new cases, death rate, and percentage of full-vaccinated population in Brazil in 2021.

| <b>Date<br/>(MM/DD/YY)</b> | <b>Daily 7-day rolling average cases<br/>per 10.000.000 habitants</b> | <b>Daily<br/>death rate</b> | <b>Full-vaccinated<br/>population (%)</b> |
|----------------------------|-----------------------------------------------------------------------|-----------------------------|-------------------------------------------|
| 01/01/21                   | 1682                                                                  | 703                         | 0                                         |
| 01/02/21                   | 1667                                                                  | 703                         | 0                                         |
| 01/03/21                   | 1665                                                                  | 699                         | 0                                         |
| 01/04/21                   | 1649                                                                  | 708                         | 0                                         |
| 01/05/21                   | 1660                                                                  | 727                         | 0                                         |
| 01/06/21                   | 1706                                                                  | 729                         | 0                                         |
| 01/07/21                   | 1930                                                                  | 801                         | 0                                         |
| 01/08/21                   | 2174                                                                  | 888                         | 0                                         |
| 01/09/21                   | 2415                                                                  | 991                         | 0                                         |
| 01/10/21                   | 2494                                                                  | 1016                        | 0                                         |
| 01/11/21                   | 2532                                                                  | 1001                        | 0                                         |
| 01/12/21                   | 2575                                                                  | 992                         | 0                                         |
| 01/13/21                   | 2557                                                                  | 997                         | 0                                         |
| 01/14/21                   | 2426                                                                  | 945                         | 0                                         |
| 01/15/21                   | 2489                                                                  | 953                         | 0                                         |
| 01/16/21                   | 2536                                                                  | 953                         | 0                                         |
| 01/17/21                   | 2552                                                                  | 962                         | 0                                         |
| 01/18/21                   | 2540                                                                  | 960                         | 0                                         |
| 01/19/21                   | 2525                                                                  | 965                         | 0                                         |
| 01/20/21                   | 2556                                                                  | 984                         | 0                                         |
| 01/21/21                   | 2493                                                                  | 1011                        | 0                                         |
| 01/22/21                   | 2410                                                                  | 1002                        | 0                                         |
| 01/23/21                   | 2409                                                                  | 1021                        | 0                                         |
| 01/24/21                   | 2389                                                                  | 1027                        | 0                                         |
| 01/25/21                   | 2400                                                                  | 1058                        | 0                                         |
| 01/26/21                   | 2397                                                                  | 1057                        | 0                                         |
| 01/27/21                   | 2398                                                                  | 1048                        | 0                                         |
| 01/28/21                   | 2411                                                                  | 1061                        | 0                                         |
| 01/29/21                   | 2430                                                                  | 1064                        | 0                                         |
| 01/30/21                   | 2395                                                                  | 1070                        | 0                                         |
| 01/31/21                   | 2391                                                                  | 1067                        | 0                                         |
| 02/01/21                   | 2378                                                                  | 1057                        | 0                                         |
| 02/02/21                   | 2342                                                                  | 1072                        | 0                                         |
| 02/03/21                   | 2273                                                                  | 1053                        | 0                                         |
| 02/04/21                   | 2248                                                                  | 1029                        | 0                                         |
| 02/05/21                   | 2196                                                                  | 1053                        | 0                                         |
| 02/06/21                   | 2151                                                                  | 1016                        | 0.01                                      |
| 02/07/21                   | 2139                                                                  | 1005                        | 0.01                                      |
| 02/08/21                   | 2140                                                                  | 1019                        | 0.02                                      |
| 02/09/21                   | 2106                                                                  | 1027                        | 0.02                                      |
| 02/10/21                   | 2151                                                                  | 1050                        | 0.04                                      |
| 02/11/21                   | 2127                                                                  | 1074                        | 0.05                                      |
| 02/12/21                   | 2109                                                                  | 1069                        | 0.08                                      |
| 02/13/21                   | 2099                                                                  | 1082                        | 0.09                                      |

|          |      |      |      |
|----------|------|------|------|
| 02/14/21 | 2130 | 1105 | 0.1  |
| 02/15/21 | 2111 | 1090 | 0.13 |
| 02/16/21 | 2205 | 1058 | 0.26 |
| 02/17/21 | 2112 | 1033 | 0.34 |
| 02/18/21 | 2112 | 1033 | 0.42 |
| 02/19/21 | 2133 | 1049 | 0.49 |
| 02/20/21 | 2183 | 1049 | 0.53 |
| 02/21/21 | 2175 | 1043 | 0.55 |
| 02/22/21 | 2215 | 1057 | 0.6  |
| 02/23/21 | 2204 | 1095 | 0.67 |
| 02/24/21 | 2325 | 1132 | 0.75 |
| 02/25/21 | 2424 | 1151 | 0.82 |
| 02/26/21 | 2499 | 1153 | 0.88 |
| 02/27/21 | 2539 | 1185 | 0.89 |
| 02/28/21 | 2565 | 1208 | 0.9  |
| 03/01/21 | 2622 | 1225 | 0.95 |
| 03/02/21 | 2596 | 1277 | 1.01 |
| 03/03/21 | 2647 | 1334 | 1.08 |
| 03/04/21 | 2698 | 1368 | 1.15 |
| 03/05/21 | 2759 | 1421 | 1.22 |
| 03/06/21 | 2816 | 1455 | 1.26 |
| 03/07/21 | 3138 | 1501 | 1.27 |
| 03/08/21 | 3113 | 1543 | 1.33 |
| 03/09/21 | 3190 | 1576 | 1.4  |
| 03/10/21 | 3247 | 1652 | 1.48 |
| 03/11/21 | 3254 | 1707 | 1.55 |
| 03/12/21 | 3321 | 1766 | 1.62 |
| 03/13/21 | 3344 | 1832 | 1.66 |
| 03/14/21 | 3089 | 1828 | 1.67 |
| 03/15/21 | 3140 | 1858 | 1.72 |
| 03/16/21 | 3236 | 1987 | 1.77 |
| 03/17/21 | 3284 | 2027 | 1.83 |
| 03/18/21 | 3357 | 2102 | 1.88 |
| 03/19/21 | 3395 | 2179 | 1.92 |
| 03/20/21 | 3414 | 2238 | 1.94 |
| 03/21/21 | 3441 | 2263 | 1.94 |
| 03/22/21 | 3518 | 2301 | 1.99 |
| 03/23/21 | 3516 | 2344 | 2.03 |
| 03/24/21 | 3531 | 2295 | 2.08 |
| 03/25/21 | 3600 | 2285 | 2.13 |
| 03/26/21 | 3547 | 2407 | 2.17 |
| 03/27/21 | 3604 | 2555 | 2.19 |
| 03/28/21 | 3601 | 2603 | 2.2  |
| 03/29/21 | 3511 | 2662 | 2.25 |
| 03/30/21 | 3520 | 2734 | 2.32 |
| 03/31/21 | 3505 | 2964 | 2.38 |
| 04/01/21 | 3435 | 3107 | 2.45 |
| 04/02/21 | 3362 | 3006 | 2.47 |

|          |      |      |      |
|----------|------|------|------|
| 04/03/21 | 3079 | 2791 | 2.5  |
| 04/04/21 | 2981 | 2743 | 2.52 |
| 04/05/21 | 2982 | 2728 | 2.62 |
| 04/06/21 | 2973 | 2787 | 2.75 |
| 04/07/21 | 2973 | 2751 | 2.85 |
| 04/08/21 | 2978 | 2822 | 2.99 |
| 04/09/21 | 3103 | 2957 | 3.2  |
| 04/10/21 | 3285 | 3024 | 3.27 |
| 04/11/21 | 3330 | 3112 | 3.3  |
| 04/12/21 | 3310 | 3084 | 3.46 |
| 04/13/21 | 3294 | 3039 | 3.62 |
| 04/14/21 | 3200 | 3007 | 3.81 |
| 04/15/21 | 3084 | 2913 | 4.01 |
| 04/16/21 | 3059 | 2854 | 4.29 |
| 04/17/21 | 3072 | 2925 | 4.45 |
| 04/18/21 | 3070 | 2877 | 4.49 |
| 04/19/21 | 3049 | 2884 | 4.77 |
| 04/20/21 | 2982 | 2825 | 5.01 |
| 04/21/21 | 2978 | 2790 | 5.12 |
| 04/22/21 | 2824 | 2584 | 5.33 |
| 04/23/21 | 2723 | 2542 | 5.74 |
| 04/24/21 | 2691 | 2526 | 5.85 |
| 04/25/21 | 2657 | 2499 | 5.88 |
| 04/26/21 | 2629 | 2445 | 6.16 |
| 04/27/21 | 2651 | 2407 | 6.55 |
| 04/28/21 | 2673 | 2381 | 6.84 |
| 04/29/21 | 2809 | 2521 | 7.09 |
| 04/30/21 | 2828 | 2495 | 7.34 |
| 05/01/21 | 2791 | 2420 | 7.4  |
| 05/02/21 | 2762 | 2410 | 7.42 |
| 05/03/21 | 2806 | 2374 | 7.62 |
| 05/04/21 | 2764 | 2359 | 7.82 |
| 05/05/21 | 2758 | 2325 | 7.98 |
| 05/06/21 | 2782 | 2254 | 8.11 |
| 05/07/21 | 2815 | 2158 | 8.24 |
| 05/08/21 | 2838 | 2135 | 8.28 |
| 05/09/21 | 2861 | 2086 | 8.29 |
| 05/10/21 | 2843 | 2084 | 8.45 |
| 05/11/21 | 2847 | 1979 | 8.59 |
| 05/12/21 | 2846 | 1952 | 8.73 |
| 05/13/21 | 2897 | 1915 | 8.79 |
| 05/14/21 | 2904 | 1915 | 8.88 |
| 05/15/21 | 2942 | 1903 | 8.92 |
| 05/16/21 | 2974 | 1923 | 8.96 |
| 05/17/21 | 2969 | 1920 | 9.08 |
| 05/18/21 | 3001 | 1949 | 9.21 |
| 05/19/21 | 3028 | 1937 | 9.31 |
| 05/20/21 | 3050 | 1971 | 9.44 |

|          |      |      |       |
|----------|------|------|-------|
| 05/21/21 | 3041 | 1962 | 9.56  |
| 05/22/21 | 3045 | 1923 | 9.62  |
| 05/23/21 | 3051 | 1898 | 9.72  |
| 05/24/21 | 3064 | 1866 | 9.86  |
| 05/25/21 | 3059 | 1828 | 10    |
| 05/26/21 | 3059 | 1823 | 10.1  |
| 05/27/21 | 2933 | 1764 | 10.2  |
| 05/28/21 | 2781 | 1807 | 10.32 |
| 05/29/21 | 2834 | 1838 | 10.35 |
| 05/30/21 | 2854 | 1841 | 10.37 |
| 05/31/21 | 2848 | 1856 | 10.44 |
| 06/01/21 | 2881 | 1878 | 10.54 |
| 06/02/21 | 2988 | 1884 | 10.67 |
| 06/03/21 | 3065 | 1857 | 10.71 |
| 06/04/21 | 2993 | 1681 | 10.75 |
| 06/05/21 | 2898 | 1642 | 10.79 |
| 06/06/21 | 2891 | 1638 | 10.81 |
| 06/07/21 | 2912 | 1664 | 10.86 |
| 06/08/21 | 2757 | 1709 | 10.94 |
| 06/09/21 | 2681 | 1692 | 11    |
| 06/10/21 | 2782 | 1776 | 11.06 |
| 06/11/21 | 3070 | 1917 | 11.12 |
| 06/12/21 | 3151 | 1961 | 11.13 |
| 06/13/21 | 3128 | 1995 | 11.14 |
| 06/14/21 | 3148 | 1977 | 11.18 |
| 06/15/21 | 3358 | 1982 | 11.23 |
| 06/16/21 | 3369 | 2026 | 11.27 |
| 06/17/21 | 3271 | 1999 | 11.33 |
| 06/18/21 | 3332 | 2042 | 11.39 |
| 06/19/21 | 3359 | 2075 | 11.43 |
| 06/20/21 | 3410 | 2062 | 11.44 |
| 06/21/21 | 3428 | 2056 | 11.49 |
| 06/22/21 | 3676 | 1973 | 11.56 |
| 06/23/21 | 3615 | 1911 | 11.63 |
| 06/24/21 | 3616 | 1871 | 11.78 |
| 06/25/21 | 3480 | 1804 | 11.87 |
| 06/26/21 | 3365 | 1706 | 11.93 |
| 06/27/21 | 3280 | 1662 | 11.95 |
| 06/28/21 | 3191 | 1624 | 12.09 |
| 06/29/21 | 2802 | 1600 | 12.31 |
| 06/30/21 | 2600 | 1571 | 12.45 |
| 07/01/21 | 2497 | 1556 | 12.59 |
| 07/02/21 | 2420 | 1537 | 12.74 |
| 07/03/21 | 2374 | 1554 | 12.81 |
| 07/04/21 | 2330 | 1562 | 12.85 |
| 07/05/21 | 2303 | 1572 | 13.02 |
| 07/06/21 | 2274 | 1547 | 13.23 |
| 07/07/21 | 2321 | 1478 | 13.52 |



|          |      |      |       |
|----------|------|------|-------|
| 07/08/21 | 2274 | 1449 | 13.81 |
| 07/09/21 | 2240 | 1391 | 14.04 |
| 07/10/21 | 2176 | 1323 | 14.2  |
| 07/11/21 | 2134 | 1294 | 14.27 |
| 07/12/21 | 2076 | 1293 | 14.49 |
| 07/13/21 | 1988 | 1278 | 14.75 |
| 07/14/21 | 2001 | 1271 | 15.06 |
| 07/15/21 | 2003 | 1254 | 15.34 |
| 07/16/21 | 1899 | 1243 | 15.64 |
| 07/17/21 | 1932 | 1259 | 15.8  |
| 07/18/21 | 1916 | 1247 | 15.84 |
| 07/19/21 | 1899 | 1230 | 16.07 |
| 07/20/21 | 1783 | 1190 | 16.38 |
| 07/21/21 | 1781 | 1171 | 16.73 |
| 07/22/21 | 1743 | 1146 | 17.14 |
| 07/23/21 | 2172 | 1132 | 17.37 |
| 07/24/21 | 2076 | 1104 | 17.51 |
| 07/25/21 | 2086 | 1104 | 17.56 |
| 07/26/21 | 2117 | 1098 | 17.81 |
| 07/27/21 | 2200 | 1085 | 18.11 |
| 07/28/21 | 2141 | 1081 | 18.51 |
| 07/29/21 | 2092 | 1068 | 18.86 |
| 07/30/21 | 1647 | 1010 | 19.21 |
| 07/31/21 | 1650 | 992  | 19.4  |
| 08/01/21 | 1664 | 982  | 19.44 |
| 08/02/21 | 1647 | 971  | 19.7  |
| 08/03/21 | 1573 | 963  | 20.01 |
| 08/04/21 | 1529 | 920  | 20.45 |
| 08/05/21 | 1517 | 890  | 20.75 |
| 08/06/21 | 1532 | 900  | 21.07 |
| 08/07/21 | 1562 | 907  | 21.21 |
| 08/08/21 | 1519 | 904  | 21.28 |
| 08/09/21 | 1496 | 899  | 21.57 |
| 08/10/21 | 1516 | 903  | 21.95 |
| 08/11/21 | 1482 | 899  | 22.26 |
| 08/12/21 | 1458 | 883  | 22.61 |
| 08/13/21 | 1393 | 874  | 22.97 |
| 08/14/21 | 1325 | 861  | 23.18 |
| 08/15/21 | 1324 | 861  | 23.23 |
| 08/16/21 | 1342 | 848  | 23.65 |
| 08/17/21 | 1366 | 823  | 24.19 |
| 08/18/21 | 1397 | 815  | 24.59 |
| 08/19/21 | 1398 | 816  | 25.09 |
| 08/20/21 | 1406 | 817  | 25.5  |
| 08/21/21 | 1380 | 774  | 25.71 |
| 08/22/21 | 1381 | 766  | 25.78 |
| 08/23/21 | 1364 | 766  | 26.17 |
| 08/24/21 | 1316 | 732  | 26.64 |

|          |      |     |       |
|----------|------|-----|-------|
| 08/25/21 | 1248 | 718 | 27.03 |
| 08/26/21 | 1214 | 696 | 27.48 |
| 08/27/21 | 1171 | 685 | 27.92 |
| 08/28/21 | 1155 | 688 | 28.23 |
| 08/29/21 | 1137 | 680 | 28.35 |
| 08/30/21 | 1118 | 666 | 28.69 |
| 08/31/21 | 1085 | 669 | 29.3  |
| 09/01/21 | 1057 | 642 | 29.79 |
| 09/02/21 | 1031 | 629 | 30.33 |
| 09/03/21 | 1003 | 618 | 30.89 |
| 09/04/21 | 985  | 619 | 31.2  |
| 09/05/21 | 995  | 618 | 31.3  |
| 09/06/21 | 977  | 604 | 31.64 |
| 09/07/21 | 889  | 525 | 31.79 |
| 09/08/21 | 812  | 461 | 32.31 |
| 09/09/21 | 850  | 467 | 32.99 |
| 09/10/21 | 803  | 452 | 33.73 |
| 09/11/21 | 759  | 457 | 34.14 |
| 09/12/21 | 727  | 461 | 34.28 |
| 09/13/21 | 717  | 470 | 34.76 |
| 09/14/21 | 716  | 520 | 35.43 |
| 09/15/21 | 710  | 599 | 35.98 |
| 09/16/21 | 728  | 576 | 36.44 |
| 09/17/21 | 854  | 576 | 37.17 |
| 09/18/21 | 777  | 564 | 37.5  |
| 09/19/21 | 771  | 557 | 37.61 |
| 09/20/21 | 775  | 554 | 37.97 |
| 09/21/21 | 787  | 553 | 38.54 |
| 09/22/21 | 916  | 534 | 39.09 |
| 09/23/21 | 846  | 529 | 39.66 |
| 09/24/21 | 734  | 535 | 40.24 |
| 09/25/21 | 827  | 529 | 40.56 |
| 09/26/21 | 825  | 531 | 40.71 |
| 09/27/21 | 825  | 521 | 41.04 |
| 09/28/21 | 835  | 542 | 41.64 |
| 09/29/21 | 730  | 544 | 42.18 |
| 09/30/21 | 711  | 541 | 42.73 |
| 10/01/21 | 707  | 514 | 43.35 |
| 10/02/21 | 697  | 501 | 43.67 |
| 10/03/21 | 699  | 496 | 43.77 |
| 10/04/21 | 713  | 497 | 44.08 |
| 10/05/21 | 748  | 478 | 44.51 |
| 10/06/21 | 759  | 462 | 45.02 |
| 10/07/21 | 710  | 437 | 45.51 |
| 10/08/21 | 714  | 457 | 46.01 |
| 10/09/21 | 730  | 451 | 46.3  |
| 10/10/21 | 725  | 440 | 46.51 |
| 10/11/21 | 695  | 441 | 46.77 |

|          |     |     |       |
|----------|-----|-----|-------|
| 10/12/21 | 596 | 368 | 46.88 |
| 10/13/21 | 528 | 316 | 47.13 |
| 10/14/21 | 532 | 337 | 47.79 |
| 10/15/21 | 504 | 319 | 48.38 |
| 10/16/21 | 470 | 326 | 48.75 |
| 10/17/21 | 455 | 323 | 48.89 |
| 10/18/21 | 471 | 322 | 49.17 |
| 10/19/21 | 510 | 351 | 49.7  |
| 10/20/21 | 559 | 379 | 50.27 |
| 10/21/21 | 571 | 364 | 50.56 |
| 10/22/21 | 565 | 355 | 50.93 |
| 10/23/21 | 579 | 339 | 51.13 |
| 10/24/21 | 568 | 337 | 51.38 |
| 10/25/21 | 558 | 338 | 52.13 |
| 10/26/21 | 559 | 342 | 52.61 |
| 10/27/21 | 568 | 347 | 53.11 |
| 10/28/21 | 546 | 333 | 53.56 |
| 10/29/21 | 541 | 328 | 54    |
| 10/30/21 | 529 | 309 | 54.16 |
| 10/31/21 | 539 | 311 | 54.26 |
| 11/01/21 | 518 | 296 | 54.34 |
| 11/02/21 | 468 | 260 | 54.39 |
| 11/03/21 | 463 | 225 | 54.68 |
| 11/04/21 | 460 | 234 | 55.11 |
| 11/05/21 | 462 | 230 | 55.72 |
| 11/06/21 | 470 | 242 | 55.92 |
| 11/07/21 | 467 | 233 | 56.03 |
| 11/08/21 | 482 | 236 | 56.49 |
| 11/09/21 | 521 | 244 | 56.89 |
| 11/10/21 | 512 | 255 | 57.31 |
| 11/11/21 | 528 | 227 | 57.76 |
| 11/12/21 | 538 | 262 | 58.14 |
| 11/13/21 | 526 | 262 | 58.35 |
| 11/14/21 | 517 | 261 | 58.47 |
| 11/15/21 | 490 | 254 | 58.63 |
| 11/16/21 | 455 | 245 | 58.84 |
| 11/17/21 | 442 | 260 | 59.33 |
| 11/18/21 | 414 | 265 | 59.65 |
| 11/19/21 | 400 | 210 | 59.99 |
| 11/20/21 | 392 | 196 | 60.21 |
| 11/21/21 | 397 | 200 | 60.38 |
| 11/22/21 | 407 | 208 | 60.67 |
| 11/23/21 | 446 | 230 | 61    |
| 11/24/21 | 440 | 215 | 61.32 |
| 11/25/21 | 446 | 217 | 61.55 |
| 11/26/21 | 436 | 227 | 61.87 |
| 11/27/21 | 437 | 230 | 62    |
| 11/28/21 | 426 | 227 | 62.1  |

|          |     |     |       |
|----------|-----|-----|-------|
| 11/29/21 | 429 | 226 | 62.17 |
| 11/30/21 | 414 | 231 | 62.58 |
| 12/01/21 | 414 | 230 | 62.92 |
| 12/02/21 | 412 | 217 | 63.24 |
| 12/03/21 | 410 | 207 | 63.76 |
| 12/04/21 | 404 | 195 | 63.94 |
| 12/05/21 | 412 | 194 | 63.98 |
| 12/06/21 | 422 | 196 | 64.19 |
| 12/07/21 | 421 | 187 | 64.44 |
| 12/08/21 | 407 | 183 | 64.6  |
| 12/09/21 | 386 | 183 | 64.92 |
| 12/10/21 | 362 | 183 | 65.11 |
| 12/11/21 | 330 | 169 | 65.14 |
| 12/12/21 | 310 | 171 | 65.15 |
| 12/13/21 | 288 | 158 | 65.32 |
| 12/14/21 | 250 | 137 | 65.49 |
| 12/15/21 | 216 | 146 | 65.84 |
| 12/16/21 | 182 | 135 | 65.97 |
| 12/17/21 | 164 | 130 | 66.08 |
| 12/18/21 | 162 | 142 | 66.11 |
| 12/19/21 | 161 | 139 | 66.12 |
| 12/20/21 | 160 | 144 | 66.22 |
| 12/21/21 | 156 | 138 | 66.32 |
| 12/22/21 | 143 | 116 | 66.53 |
| 12/23/21 | 144 | 117 | 66.55 |
| 12/24/21 | 139 | 112 | 66.59 |
| 12/25/21 | 148 | 96  | 66.61 |
| 12/26/21 | 172 | 95  | 66.64 |
| 12/27/21 | 200 | 93  | 66.71 |
| 12/28/21 | 236 | 108 | 66.81 |
| 12/29/21 | 279 | 104 | 66.96 |
| 12/30/21 | 339 | 108 | 67.01 |
| 12/31/21 | 382 | 97  | 67.03 |
